# Supplementary material for: Sleep Respiratory Disturbances in Girls with Rett Syndrome
Source: MDPI journal article supplement (doi:10.3390/ijerph192013082), 2022-10-12
Supplement: s1 [file s1]

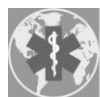

**Supplementary Table S1.** Cohen's *d* of RTT strata.

| Stratification          |                 | RTT stratum                    | Statistics   | AHI             | Apnea Index     | Hypopnea Index  | ODI               | Mean SpO2 (%)     | Nadir SpO2 (%)   |
|-------------------------|-----------------|--------------------------------|--------------|-----------------|-----------------|-----------------|-------------------|-------------------|------------------|
| Genetic characteristics | Mutation type   | ms                             | mean± SD [n] | 7.7 ± 7.35 [2]  | 6 ± 6.93 [2]    | 1.7 ± 0.42 [2]  | 8 ± 7.35 [2]      | 97.5 ± 0.71 [2]   | 90 ± 1.41 [2]    |
|                         |                 | ns                             | mean± SD [n] | 4.18 ± 2.15 [4] | 2.73 ± 1.27 [3] | 2.10 ± 1.00 [4] | 26.88 ± 42.26 [4] | 71.50 ± 46.48 [4] | 86.00 ± 6.00 [4] |
|                         |                 | Standardized mean difference   | Cohen's D    | 0.85            | 0.79            | -0.45           | -0.51             | 0.65              | 0.76             |
|                         | Mutation domain | MBD                            | mean± SD [n] | 6.57 ± 5.56 [3] | 4.67 ± 5.24 [3] | 1.90 ± 0.46 [3] | 6.17 ± 6.09 [3]   | -                 | 90.33 ± 1.15 [3] |
|                         |                 | TRD                            | mean± SD [n] | 5.65 ± 0.21 [2] | 3.10 ± 1.56 [2] | 2.50 ± 1.27 [2] | 50.65 ± 55.65 [2] | -                 | 81.00 ± 2.83 [2] |
|                         |                 | Standardized mean difference   | Cohen's D    | 0.20            | 0.36            | -0.73           | -1.37             | -                 | 4.95             |
| Clinical severity items | Epilepsy        | not have                       | mean± SD [n] | 8.10 ± 5.25 [3] | 4.77 ± 5.35 [3] | 3.30 ± 2.88 [3] | 11.77 ± 8.34 [3]  | 93.67 ± 6.66 [3]  | 84.67 ± 9.29 [3] |
|                         |                 | have                           | mean± SD [n] | 4.18 ± 2.15 [4] | 2.73 ± 1.27 [3] | 2.10 ± 1.00 [4] | 26.88 ± 42.26 [4] | 71.5 ± 46.48 [4]  | 86.00 ± 6.00 [4] |
|                         |                 | Standardized mean difference   | Cohen's D    | 1.06            | 0.52            | 0.61            | -0.46             | 0.61              | -0.18            |
|                         | Hand function   | No hand functional abnormality | mean± SD [n] | 7.00 ± 8.34 [2] | -               | 1.55 ± 0.64 [2] | 8.45 ± 6.72 [2]   | 96.00 ± 1.41 [2]  | 90.00 ± 1.41 [2] |
|                         |                 | Non-functional handuse         | mean± SD [n] | 5.68 ± 2.62 [4] | -               | 3.23 ± 2.36 [4] | 30.85 ± 40.00 [4] | 69.00 ± 44.94 [4] | 81.75 ± 7.18 [4] |
|                         |                 | Standardized mean difference   | Cohen's D    | 0.28            | -               | 0.97            | -0.64             | 0.69              | 1.32             |
|                         | Sitting         | No sitting abnormality         | mean± SD [n] | 6.50 ± 5.96 [3] | 6.45 ± 6.29 [2] | 2.17 ± 1.16 [3] | 9.40 ± 5.03 [3]   | 64.67 ± 54.28 [3] | 87.67 ± 4.16 [3] |
|                         |                 | Unable                         | mean± SD [n] | 5.73 ± 3.20 [3] | 2.53 ± 1.56 [3] | 3.17 ± 2.89 [3] | 37.37 ± 46.32 [3] | 91.33 ± 6.11 [3]  | 81.33 ± 8.74 [3] |
|                         |                 | Standardized mean difference   | Cohen's D    | 0.16            | 1.02            | -0.45           | -0.85             | -0.69             | 0.93             |
|                         | Walking         | No walking abnormality         | mean± SD [n] | 7.00 ± 8.34 [2] | -               | 1.55 ± 0.64 [2] | 8.45 ± 6.72 [2]   | 96.00 ± 1.41 [2]  | 90.00 ± 1.41 [2] |
|                         |                 | Walking with support           | mean± SD [n] | 4.90 ± 0.85 [2] | -               | 2.85 ± 0.78 [2] | 6.90 ± 6.22 [2]   | 50.50 ± 68.59 [2] | 87.00 ± 5.66 [2] |
|                         |                 | Standardized mean difference   | Cohen's D    | 0.35            | -               | -1.82           | 0.24              | 0.94              | 0.73             |
|                         |                 | No walking abnormality         | mean± SD [n] | 7.00 ± 8.34 [2] | -               | 1.55 ± 0.64 [2] | 8.45 ± 6.72 [2]   | 96.00 ± 1.41 [2]  | 90.00 ± 1.41 [2] |
|                         |                 | Unable                         | mean± SD [n] | 5.73 ± 3.20 [3] | -               | 3.17 ± 2.89 [3] | 37.37 ± 46.32 [3] | 91.33 ± 6.11 [3]  | 81.33 ± 8.74 [3] |
|                         |                 | Standardized mean difference   | Cohen's D    | 0.23            | -               | -0.68           | -0.76             | 0.92              | 1.21             |
|                         | Scoliosis       | Had no deviation               | mean± SD [n] | 6.58 ± 5.26 [4] | 4.77 ± 5.35 [3] | 2.98 ± 2.37 [4] | 9.75 ± 7.92 [4]   | 94.00 ± 5.48 [4]  | 86.25 ± 8.22 [4] |
|                         |                 | Severe scoliosis               | mean± SD [n] | 5.65 ± 0.21 [2] | 3.10 ± 1.56 [2] | 2.50 ± 1.27 [2] | 50.65 ± 55.65 [2] | 46.00 ± 62.23 [2] | 81.00 ± 2.23 [2] |
|                         |                 | Standardized mean difference   | Cohen's D    | 0.20            | 0.37            | 0.22            | -1.43             | 1.53              | 0.73             |

**AHI:** apnea-hypopnea index; **MBD:** Methyl-CpG-Binding Domain; **ms:** missense mutation; **ns:** nonsense mutation; **ODI:** oxygen desaturation index; **RTT:** Rett Syndrome; **SD:** standard deviation.
